# Supplementary material
Source: Springer Nature journal article supplement (https://www.springermedizin.de/resource/supplementary/13058_2011_2939_MOESM7_ESM.pdf/9702936)
Supplement: MOESM7 [file 9702936]

## Quartiles according to ER RNA Levels

## Quartiles according to HER2 RNA Levels

**A**

All ER HER2-ve

**ABC**

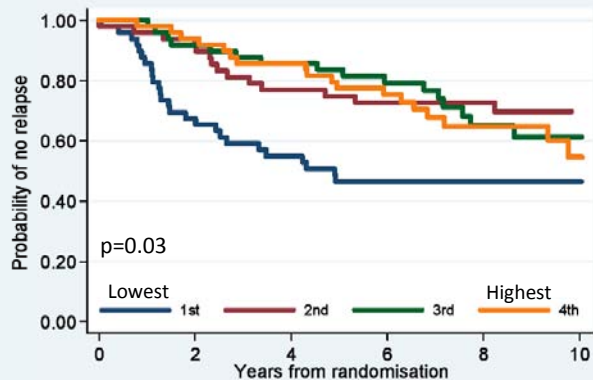

| Number at risk    | ER_quartile = 1st | ER_quartile = 2nd | ER_quartile = 3rd | ER_quartile = 4th |    |
|-------------------|-------------------|-------------------|-------------------|-------------------|----|
| ER_quartile = 1st | 49                | 33                | 26                | 22                | 20 |
| ER_quartile = 2nd | 49                | 44                | 36                | 33                | 24 |
| ER_quartile = 3rd | 49                | 45                | 41                | 34                | 21 |
| ER_quartile = 4th | 50                | 46                | 42                | 33                | 17 |

**B**

All ER HER2-ve

**ABC**

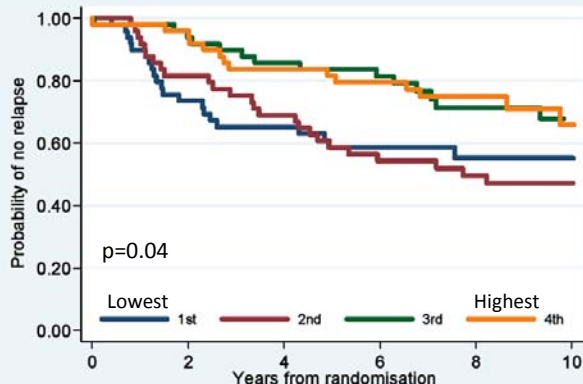

| Number at risk      | HER2_quartile = 1st | HER2_quartile = 2nd | HER2_quartile = 3rd | HER2_quartile = 4th |    |
|---------------------|---------------------|---------------------|---------------------|---------------------|----|
| HER2_quartile = 1st | 49                  | 36                  | 30                  | 25                  | 15 |
| HER2_quartile = 2nd | 49                  | 39                  | 33                  | 25                  | 20 |
| HER2_quartile = 3rd | 49                  | 46                  | 41                  | 36                  | 24 |
| HER2_quartile = 4th | 50                  | 47                  | 41                  | 36                  | 23 |

**C**

ER+ve HER2-ve

**ABC**

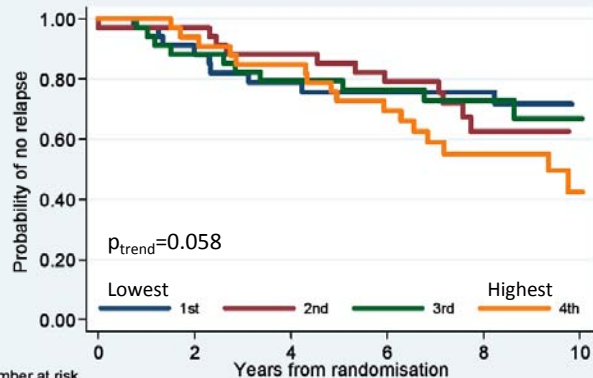

| Number at risk    | ER_quartile = 1st | ER_quartile = 2nd | ER_quartile = 3rd | ER_quartile = 4th |    |
|-------------------|-------------------|-------------------|-------------------|-------------------|----|
| ER_quartile = 1st | 34                | 29                | 25                | 23                | 19 |
| ER_quartile = 2nd | 34                | 33                | 30                | 25                | 13 |
| ER_quartile = 3rd | 34                | 30                | 27                | 24                | 12 |
| ER_quartile = 4th | 34                | 31                | 28                | 21                | 12 |

**D**

ER+ve HER2-ve

**ABC**

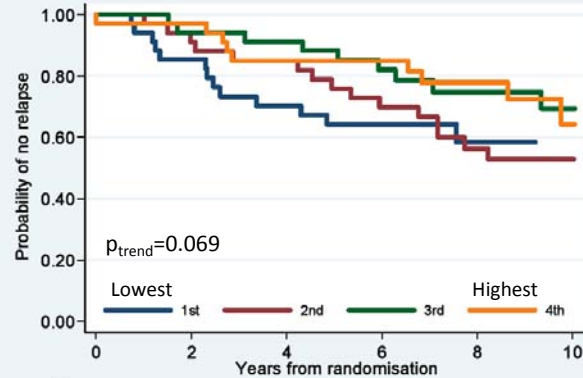

| Number at risk      | HER2_quartile = 1st | HER2_quartile = 2nd | HER2_quartile = 3rd | HER2_quartile = 4th |    |
|---------------------|---------------------|---------------------|---------------------|---------------------|----|
| HER2_quartile = 1st | 34                  | 29                  | 23                  | 20                  | 9  |
| HER2_quartile = 2nd | 34                  | 30                  | 28                  | 23                  | 16 |
| HER2_quartile = 3rd | 34                  | 32                  | 31                  | 24                  | 18 |
| HER2_quartile = 4th | 34                  | 32                  | 28                  | 26                  | 15 |

**E**

ER+ve HER2-ve

**Trans ATAC**

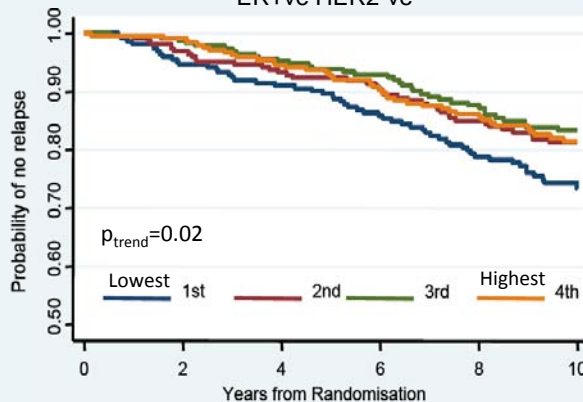

| Number at risk    | ER_quartile = 1st | ER_quartile = 2nd | ER_quartile = 3rd | ER_quartile = 4th |     |
|-------------------|-------------------|-------------------|-------------------|-------------------|-----|
| ER_quartile = 1st | 224               | 211               | 199               | 179               | 153 |
| ER_quartile = 2nd | 227               | 216               | 201               | 189               | 166 |
| ER_quartile = 3rd | 235               | 226               | 213               | 199               | 169 |
| ER_quartile = 4th | 246               | 241               | 225               | 200               | 177 |

**F**

ER+ve HER2-ve

**Trans ATAC**

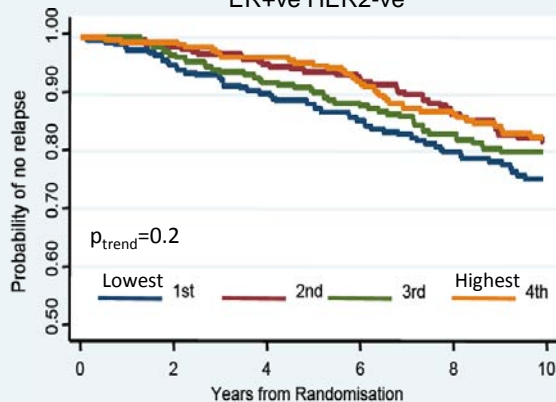

| Number at risk      | HER2_quartile = 1st | HER2_quartile = 2nd | HER2_quartile = 3rd | HER2_quartile = 4th |     |
|---------------------|---------------------|---------------------|---------------------|---------------------|-----|
| HER2_quartile = 1st | 73                  | 228                 | 215                 | 198                 | 173 |
| HER2_quartile = 2nd | 96                  | 238                 | 230                 | 219                 | 209 |
| HER2_quartile = 3rd | 90                  | 234                 | 222                 | 207                 | 188 |
| HER2_quartile = 4th | 95                  | 232                 | 227                 | 214                 | 197 |
